# Supplementary material
Source: publisher site journal article supplement (https://www.dovepress.com/article/160760)
Supplement: Supplementary file 1 [file get_supplementary_file.php]

## Appendix 1

### Electronic Search strategy

Table.S1 Medline search strategy  
2017

Search time: June.28<sup>th</sup>

| <b>Database: Medline 2000 to present</b> |                                                                        |             |
|------------------------------------------|------------------------------------------------------------------------|-------------|
| Search                                   | Query                                                                  | Items found |
| #1                                       | Search systemic lupus erythematosus[Title/Abstract]                    | 43318       |
| #2                                       | Search SLE[Title/Abstract]                                             | 28767       |
| #3                                       | Search Lupus nephritis[Title/Abstract]                                 | 6644        |
| #4                                       | Search systemic lupus erythematosus[MeSH Terms]                        | 53723       |
| #5                                       | Search lupus nephritis[MeSH Terms]                                     | 5378        |
| #6                                       | Search #1 OR #2 OR #3 OR #4 OR #5                                      | 68118       |
| #7                                       | Search pregnancy[Title/Abstract]                                       | 348771      |
| #8                                       | Search pregnancy outcomes[Title/Abstract]                              | 10634       |
| #9                                       | Search fetal outcomes[Title/Abstract]                                  | 1751        |
| #10                                      | Search maternal outcomes[Title/Abstract]                               | 1303        |
| #11                                      | Search gynecology[Title/Abstract]                                      | 23710       |
| #12                                      | Search pregnancy outcomes[MeSH Terms]                                  | 47905       |
| #13                                      | Search gynecology[MeSH Terms]                                          | 17432       |
| #14                                      | Search #7 OR#8 OR #9 OR #10 OR #11 OR #12 OR #13                       | 82846       |
| #15                                      | Search #6 AND #14                                                      | 533         |
| #16                                      | Search ("2000/01/01"[Date - Publication] : "3000"[Date - Publication]) | 13969667    |
| #17                                      | Search #15 and #16                                                     | 371         |

Table.S2 Embase search strategy  
2017

Search time: June.28<sup>th</sup>

| Database: Embase 2000 to present |                                                                                                                                                                                                                                                                                                                                                                                                           |             |
|----------------------------------|-----------------------------------------------------------------------------------------------------------------------------------------------------------------------------------------------------------------------------------------------------------------------------------------------------------------------------------------------------------------------------------------------------------|-------------|
| Search                           | Query                                                                                                                                                                                                                                                                                                                                                                                                     | Items found |
| #1                               | 'systemic lupus erythematosus':ti ab                                                                                                                                                                                                                                                                                                                                                                      | 56522       |
| #2                               | "'lupus erythematosus nephritis':ti ab"                                                                                                                                                                                                                                                                                                                                                                   | 71          |
| #3                               | systemic lupus erythematosus'/exp OR 'lupus erythematosus nephritis'/exp                                                                                                                                                                                                                                                                                                                                  | 86733       |
| #4                               | "'systemic lupus erythematosus':ti ab OR 'lupus erythematosus nephritis':ti "ab OR 'systemic lupus erythematosus'/exp OR 'lupus erythematosus nephritis'/exp"                                                                                                                                                                                                                                             | 92373       |
| #5                               | "'pregnancy':ti ab"                                                                                                                                                                                                                                                                                                                                                                                       | 423237      |
| #6                               | "'pregnancy outcomes':ti ab"                                                                                                                                                                                                                                                                                                                                                                              | 14431       |
| #7                               | "'maternal outcomes':ti ab"                                                                                                                                                                                                                                                                                                                                                                               | 1958        |
| #8                               | "'fetal outcomes':ti ab"                                                                                                                                                                                                                                                                                                                                                                                  | 2793        |
| #9                               | "'gynecology':ti ab"                                                                                                                                                                                                                                                                                                                                                                                      | 33873       |
| #10                              | pregnancy'/exp                                                                                                                                                                                                                                                                                                                                                                                            | 683455      |
| #11                              | pregnancy outcomes'/exp                                                                                                                                                                                                                                                                                                                                                                                   | 524         |
| #12                              | "'pregnancy':ti,ab OR 'pregnancy outcomes':ti ab OR 'maternal outcomes':ti ab OR 'fetal outcomes':ti ab OR 'gynecology':ti "ab OR 'pregnancy'/exp OR 'pregnancy outcomes'/exp"                                                                                                                                                                                                                            | 833425      |
| #13                              | 'systemic lupus erythematosus':ti,ab OR 'lupus erythematosus nephritis':ti ab OR 'systemic lupus erythematosus'/exp OR 'lupus erythematosus nephritis'/exp AND ('pregnancy':ti ab OR 'pregnancy outcomes':ti ab OR 'maternal outcomes':ti ab OR 'fetal outcomes':ti ab OR 'gynecology':ti,ab OR 'pregnancy'/exp OR 'pregnancy outcomes'/exp)                                                              | 4037        |
| #14                              | "'systemic lupus erythematosus':ti,ab OR 'lupus erythematosus nephritis':ti ab OR 'systemic lupus erythematosus'/exp OR 'lupus erythematosus nephritis'/exp AND ('pregnancy':ti ab OR 'pregnancy outcomes':ti ab OR 'maternal outcomes':ti ab OR 'fetal outcomes':ti ab OR 'gynecology':ti,ab OR 'pregnancy'/exp OR 'pregnancy outcomes'/exp) AND [2000-2017]/py"                                         | 2686        |
| #15                              | "'"systemic lupus erythematosus':ti, ab OR 'lupus erythematosus nephritis':ti,ab OR 'systemic lupus erythematosus'/exp OR 'lupus erythematosus nephritis'/exp AND ('pregnancy':ti,ab OR 'pregnancy outcomes':ti ab OR 'maternal outcomes':ti ab OR 'fetal outcomes':ti ab OR 'gynecology':ti "ab OR 'pregnancy'/exp OR 'pregnancy outcomes'/exp) AND [2000-2017]/py AND ([chinese]/lim OR [english]/lim)" | 2454        |

| <b>Database: Cochrane Database 2000 to present</b> |                                                                                   |             |
|----------------------------------------------------|-----------------------------------------------------------------------------------|-------------|
| Search                                             | Query                                                                             | Items found |
| #1                                                 | systemic lupus erythematosus                                                      | 1276        |
| #2                                                 | SLE                                                                               | 1045        |
| #3                                                 | Lupus nephritis                                                                   | 543         |
| #4                                                 | MeSH descriptor: [Lupus Erythematosus, Systemic] explode all trees                | 615         |
| #5                                                 | MeSH descriptor: [Lupus Nephritis] explode all trees                              | 170         |
| #6                                                 | #1 or #2 or #3 or #4 or #5                                                        | 1866        |
| #7                                                 | pregnancy                                                                         | 35649       |
| #8                                                 | pregnancy outcomes                                                                | 10322       |
| #9                                                 | fetal outcomes                                                                    | 2945        |
| #10                                                | maternal outcomes                                                                 | 5315        |
| #11                                                | gynecology                                                                        | 18574       |
| #12                                                | MeSH descriptor: [Pregnancy Outcome] explode all trees                            | 3109        |
| #13                                                | MeSH descriptor: [Pregnancy] explode all trees                                    | 5609        |
| #14                                                | MeSH descriptor: [Gynecology] explode all trees                                   | 133         |
| #15                                                | #7 or #8 or #9 or #10 or #11 or #12 or #13 or #14                                 | 48220       |
| #16                                                | #6 and #15 and kw Publication Year from 2000 (Word variations have been searched) | 162         |

Table.S4 ClinicalTrials.gov  
2017

Search time: June.28<sup>th</sup>

| <b>Database: ClinicalTrials.gov 2000 to present</b> |                                                   |             |
|-----------------------------------------------------|---------------------------------------------------|-------------|
| Search                                              | Query                                             | Items found |
| #1                                                  | Condition / Disease: Systemic lupus erythematosus |             |
| #2                                                  | Condition / Disease: Lupus erythematosus          |             |
| #3                                                  | Condition / Disease: Lupus nephritis              |             |
| #4                                                  | Other terms: Pregnancy                            |             |
| #5                                                  | #1 or #2 or #3                                    |             |
| #6                                                  | #5 and #4                                         | 16          |
| #7                                                  | #6 with results available                         | 1           |

## Appendix 2

### Newcastle-Ottawa Scale and result

#### NEWCASTLE - OTTAWA QUALITY ASSESSMENT SCALE COHORT STUDIES

Note: A study can be awarded a maximum of one star for each numbered item within the Selection and Outcome categories. A maximum of two stars can be given for Comparability. (Maximum 9 stars)

#### **Selection**

##### 1) Representativeness of the exposed cohort

- a) truly representative of the average SLE nephritis in the community \*
- b) somewhat representative of the average SLE nephritis in the community \*
- c) selected group of users eg nurses, volunteers
- d) no description of the derivation of the cohort

##### 2) Selection of the non exposed cohort

- a) drawn from the same community as the nephritis cohort \*
- b) drawn from a different source
- c) no description of the derivation of the non nephritis cohort

##### 3) Ascertainment of exposure

- a) Medical records \*
- b) Renal biopsies\*
- c) written self report
- d) no description

##### 4) Demonstration that outcome of interest was not present at start of study

- a) yes \*
- b) no

#### **Comparability**

##### 1) Comparability of cohorts on the basis of the design or analysis

- a) study controls for one confounder \*
- b) study controls for two or more confounders \*\*

## **Outcome**

### 1) Assessment of outcome

- a) independent blind assessment \*
- b) Medical records \*
- c) self report
- d) no description

### 2) Was follow-up long enough for outcomes to occur

- a) yes \*
- b) no

### 3) Adequacy of follow up of cohorts

- a) complete follow up -all subjects accounted for \*
- b) subjects lost to follow up unlikely to introduce bias – rate of follow up > 80 % \*
- c) follow up rate < 80% and no description of those lost
- d) no statement

## Newcastle-Ottawa Scale adapted for cross-sectional studies

Note: A study can be awarded a maximum of one star for each numbered item within the Selection and Outcome categories. A maximum of two stars can be given for Comparability. (Maximum 8 stars)

### Selection

#### 1) Representativeness of the sample:

- a) Truly representative of the SLE nephritis in the target population. \*
- b) Somewhat representative of the SLE nephritis in the target population. \*
- c) Selected group of users.
- d) No description of the sampling strategy.

#### 2) Sample size:

- a) Justified and satisfactory. \*
- b) Not justified.

#### 3) Non-respondents:

- a) Rate of sample loss.  $\leq 20\%$  \*
- b) Rate of sample loss.  $> 20\%$
- c) No description of the rate of sample loss.

#### 4) Ascertainment of the exposure:

- a) Medical Records. \*
- b) Renal biopsies\*
- c) No description of the exposure measurement tool.

### Comparability

#### 1) The subjects in different outcome groups are comparable, based on the study design or analysis. Confounding factors are controlled.

- a) study controls for one confounder \*

b) study controls for two or more confounders \*\*

**Outcome:**

1) Assessment of the outcome:

- a) independent blind assessment \*
- b) Medical records \*
- c) self report
- d) no description

2) Statistical test:

- a) The statistical test used to analyze the data is clearly described and appropriate, and the measurement of the association is presented, including confidence intervals and the probability level (p value). \*
- b) The statistical test is not appropriate, not described or incomplete.



Table S5. Assessment of cohort study quality-Newcastle Ottawa Scale

| Study                 | Selection      |                   | Ascertainment of exposure | Outcome of interest | Comparability | Outcome               |                     | Total Score |                       |
|-----------------------|----------------|-------------------|---------------------------|---------------------|---------------|-----------------------|---------------------|-------------|-----------------------|
|                       | Exposed cohort | Nonexposed cohort |                           |                     |               | Assessment of outcome | Length of follow-up |             | Adequacy of follow-up |
| Carmona et al.2005    | *              | *                 | *                         | *                   | *             | *                     | *                   | *           | 8                     |
| Cavallasca et al.2008 | *              | *                 | *                         | *                   | 0             | *                     | *                   | *           | 7                     |
| Whitelaw et al.2008   | *              | *                 | *                         | *                   | 0             | *                     | *                   | *           | 7                     |
| Wagner et al.2009     | *              | *                 | *                         | *                   | 0             | *                     | *                   | *           | 7                     |
| Al Arfaj et al.2010   | *              | *                 | *                         | *                   | **            | *                     | *                   | *           | 9                     |
| Gladman et al.2010    | *              | *                 | *                         | *                   | **            | *                     | *                   | *           | 9                     |
| Bramham et al.2011    | *              | *                 | *                         | *                   | **            | *                     | *                   | *           | 9                     |
| Ko et al. 2011        | *              | *                 | *                         | *                   | *             | *                     | *                   | *           | 8                     |
| Kowk et al.2011       | *              | *                 | *                         | *                   | **            | 0                     | *                   | *           | 8                     |

|                     |   |   |   |   |    |   |   |   |   |
|---------------------|---|---|---|---|----|---|---|---|---|
| Saavedra et al.2012 | * | * | * | * | 0  | * | * | * | 7 |
| Fatemi et al.2013   | * | * | * | * | ** | * | * | * | 9 |
| Madazli et al.2014  | * | * | * | * | 0  | * | * | * | 7 |
| Lv et al.2015       | * | * | * | * | ** | * | * | * | 9 |
| Mbuli et al.2015    | * | * | * | * | 0  | * | * | * | 7 |
| Ku et al.2016       | * | * | * | * | 0  | * | * | * | 7 |

Table S6. Assessment of cross-sectional study quality-Newcastle Ottawa Scale

| Study          | Selection                        |             |                                              | Comparability | Outcome               |                  | Total Score |
|----------------|----------------------------------|-------------|----------------------------------------------|---------------|-----------------------|------------------|-------------|
|                | Representativeness of the sample | Sample size | Ascertainment of exposure<br>Non-respondents |               | Assessment of outcome | Statistical test |             |
| Teh et al.2017 | *                                | *           | *                                            | 0             | *                     | *                | 6           |

## Appendix 3 STROBE checklist

Table S7: STROBE checklist result

| Study                 | Title and abstract | Introduction           |            |              |         | Methods      |           |                           |      |            |                        |                     | Results      |                  |              |              |                |             | Discussion  |                |                  |         | Other information | Total |
|-----------------------|--------------------|------------------------|------------|--------------|---------|--------------|-----------|---------------------------|------|------------|------------------------|---------------------|--------------|------------------|--------------|--------------|----------------|-------------|-------------|----------------|------------------|---------|-------------------|-------|
|                       |                    | Background / rationale | Objectives | Study design | Setting | Participants | Variables | Data sources/ measurement | Bias | Study size | Quantitative variables | Statistical methods | Participants | Descriptive data | Outcome data | Main results | Other analyses | Key results | Limitations | Interpretation | Generalisability | Funding |                   |       |
| Carmona et al.2005    | Y                  | Y                      | Y          | Y            | Y       | Y            | Y         | Y                         | N    | N          | N                      | Y                   | Y            | Y                | Y            | N            | N              | Y           | Y           | Y              | Y                | Y       | 17                |       |
| Cavallasca et al.2008 | Y                  | Y                      | Y          | Y            | Y       | N            | Y         | Y                         | N    | N          | N                      | Y                   | N            | Y                | N            | N            | N              | Y           | Y           | Y              | Y                | N       | 13                |       |
| Whitelaw et al.2008   | Y                  | Y                      | Y          | Y            | Y       | Y            | Y         | Y                         | N    | Y          | N                      | N                   | N            | Y                | N            | N            | N              | Y           | N           | Y              | Y                | N       | 13                |       |
| Wagner et al.2009     | Y                  | Y                      | Y          | Y            | Y       | Y            | Y         | Y                         | N    | Y          | Y                      | Y                   | Y            | N                | N            | N            | N              | Y           | Y           | Y              | Y                | N       | 16                |       |
| Al Arfaj et al.2010   | Y                  | Y                      | Y          | Y            | Y       | Y            | Y         | Y                         | N    | Y          | N                      | Y                   | Y            | Y                | Y            | Y            | Y              | N           | Y           | Y              | Y                | Y       | 19                |       |
| Gladman et al.2010    | Y                  | Y                      | Y          | Y            | Y       | Y            | N         | Y                         | Y    | Y          | Y                      | Y                   | Y            | Y                | Y            | N            | Y              | N           | Y           | Y              | Y                | N       | 18                |       |
| Bramham et al.2011    | Y                  | Y                      | Y          | Y            | Y       | Y            | Y         | Y                         | Y    | Y          | Y                      | Y                   | Y            | Y                | Y            | Y            | Y              | Y           | Y           | Y              | Y                | N       | 21                |       |
| Ko et al. 2011        | Y                  | Y                      | Y          | Y            | Y       | Y            | Y         | Y                         | N    | Y          | Y                      | Y                   | Y            | Y                | Y            | Y            | Y              | Y           | Y           | Y              | Y                | N       | 20                |       |
| Kowk et al.2011       | Y                  | Y                      | Y          | Y            | Y       | Y            | Y         | N                         | N    | Y          | Y                      | Y                   | Y            | Y                | Y            | Y            | Y              | Y           | Y           | Y              | Y                | N       | 19                |       |
| Saavedra et al.2012   | Y                  | Y                      | Y          | Y            | Y       | Y            | Y         | Y                         | N    | Y          | Y                      | Y                   | Y            | Y                | Y            | N            | Y              | Y           | Y           | Y              | Y                | N       | 19                |       |
| Fatemi et al.2013     | Y                  | Y                      | Y          | Y            | N       | Y            | Y         | Y                         | N    | Y          | Y                      | Y                   | Y            | Y                | Y            | N            | Y              | Y           | Y           | Y              | Y                | Y       | 19                |       |
| Madazli et al.2014    | Y                  | Y                      | Y          | Y            | Y       | Y            | Y         | Y                         | N    | Y          | N                      | Y                   | N            | Y                | N            | N            | N              | Y           | N           | Y              | Y                | N       | 14                |       |
| Lv et al.2015         | Y                  | Y                      | Y          | Y            | Y       | Y            | Y         | Y                         | N    | Y          | Y                      | Y                   | Y            | Y                | Y            | Y            | Y              | Y           | Y           | Y              | Y                | N       | 20                |       |
| Mbuli et al.2015      | Y                  | Y                      | Y          | Y            | Y       | Y            | Y         | Y                         | N    | Y          | Y                      | Y                   | Y            | Y                | Y            | N            | Y              | Y           | Y           | Y              | Y                | N       | 19                |       |
| Ku et al.2016         | Y                  | Y                      | Y          | Y            | N       | Y            | Y         | Y                         | N    | Y          | Y                      | Y                   | Y            | Y                | Y            | Y            | Y              | Y           | Y           | Y              | Y                | N       | 19                |       |
| Teh et al.2017        | Y                  | Y                      | N          | N            | Y       | Y            | Y         | Y                         | N    | Y          | N                      | N                   | Y            | Y                | Y            | N            | Y              | Y           | Y           | Y              | Y                | Y       | 16                |       |

NOTE: Y=Yes, N=NO or unclear

## Appendix 4 Outcomes analyzed

Table S8. Maternal outcomes

| Maternal Outcome               | No of studies involved | Participants |
|--------------------------------|------------------------|--------------|
| Spontaneous abortion           | 9                      | 1195         |
| Gestational hypertension       | 5                      | 507          |
| Preeclampsia                   | 10                     | 930          |
| SLE Flare                      | 9                      | 850          |
| Renal Flare                    | 4                      | 503          |
| Cesarean Section               | 5                      | 461          |
| PROM *                         | 2                      | 210          |
| GDM *                          | 2                      | 308          |
| aPL and APS                    | 8                      | 1012         |
| Active disease at conception * | 2                      | 203          |
| Proteinuria during pregnancy   | 3                      | 254          |
| SSA+                           | 4                      | 286          |
| Hypocomplementemia             | 3                      | 312          |

NOTE: aPL= antiphospholipid antibodies include lupus anticoagulant (LA), anticardiolipin antibodies (aCL) and  $\beta$ 2-glycoprotein I( $\beta$ 2GPI); APS=Antiphospholipid syndrome was defined according to the Sapporo criteria; GDM= gestational diabetes PROM= premature rupture of membranes

\*Outcome use descriptive analyses rather than meta-analysis; Reason: 1.Studies included<3; 2.Use different outcome definition

Table S9. Fetal Outcome

| Fetal Outcome             | No of studies involved | Participants |
|---------------------------|------------------------|--------------|
| Live birth                | 15                     | 1688         |
| Stillbirth                | 9                      | 1255         |
| Preterm birth             | 13                     | 1443         |
| LBW/IUGR/SGA              | 11                     | 1382         |
| Neonatal lupus*           | 3                      | 347          |
| Congenital malformation * | 2                      | 257          |
| 1min-Apgar scores*        | 3                      | 88           |

NOTE: LBW=Low birth weight; IUGR=Intrauterine growth restriction; SGA=small for gestational age;

\*Outcome use descriptive analyses rather than meta-analysis; Reason: 1. Studies included<3; 2.Use different outcome definition

Table S10. Antenatal management

| Antenatal Management | No of studies involved | Participants |
|----------------------|------------------------|--------------|
| Steroids             | 5                      | 522          |
| Antimalarials        | 5                      | 522          |
| Immunosuppressant    | 5                      | 756          |
| Aspirin *            | 2                      | 162          |

\*Outcome use descriptive analysis rather than meta-analysis; Reason: 1.Studies included<3;

## Appendix 5 Outcomes used narrative analyses

Table S11. Narrative analyses: (A) Maternal outcome; (B) Fetal outcome; (C) Antenatal Management

### A. Maternal Outcome

|                                     | LN     |       | Non-LN |       | p value |
|-------------------------------------|--------|-------|--------|-------|---------|
|                                     | events | total | events | total |         |
| <b>PROM</b>                         |        |       |        |       |         |
| Saavedra et al.2012                 | 4      | 35    | 3      | 60    | 0.2     |
| Teh et al.2017                      | 1      | 49    | 2      | 66    | NS      |
| <b>GDM</b>                          |        |       |        |       |         |
| Gladman et al.2010                  | 1      | 81    | 3      | 112   | 0.46    |
| Teh et al.2017                      | 1      | 49    | 0      | 66    | NS      |
| <b>Active disease at conception</b> |        |       |        |       |         |
| Carmona et al.2005                  | 13     | 54    | 6      | 54    | NS      |
| Saavedra et al.2012                 | 9      | 35    | 4      | 60    | 0.009*  |

### B. Fetal Outcome

|                                     | LN             |              | Non-LN         |              | P value        |
|-------------------------------------|----------------|--------------|----------------|--------------|----------------|
|                                     | events         | total        | events         | total        |                |
| <b>Neonatal lupus</b>               |                |              |                |              |                |
| Wagner et al.2009                   | 0              | 43           | 0              | 47           | NS             |
| Gladman et al.2010                  | 1              | 81           | 3              | 112          | 0.57           |
| Ku et al.2106                       | 0              | 29           | 2              | 35           | 0.18           |
| <b>Congenital malformation</b>      |                |              |                |              |                |
| Gladman et al.2010                  | 3              | 81           | 0              | 112          | NS             |
| Ku et al.2106                       | 0              | 29           | 2              | 35           | 0.18           |
| <b>1min-Apgar scores</b>            |                |              |                |              |                |
| (Apgar score <7) Bramham et al.2011 | 9              | 43           | 5              | 63           | NS             |
|                                     | <b>mean±SD</b> | <b>total</b> | <b>mean±SD</b> | <b>total</b> | <b>P value</b> |

|               |           |    |           |    |      |
|---------------|-----------|----|-----------|----|------|
| Lv et al.2015 | 9.8 ± 0.7 | 24 | 9.9 ± 0.6 | 28 | 0.63 |
| Ku et al.2106 | 7.4±2.4   | 29 | 7.6±2.7   | 35 | 0.72 |

### C. Antenatal Management

| <b>Aspirin</b>     | <b>LN</b>     |              | <b>Non-LN</b> |              | <b>P value</b> |
|--------------------|---------------|--------------|---------------|--------------|----------------|
|                    | <b>events</b> | <b>total</b> | <b>events</b> | <b>total</b> |                |
| Bramham et al.2011 | 37            | 43           | 39            | 64           | 0.008*         |
| Kowk et al.2011    | 0             | 30           | 3             | 25           | 0.057          |

NOTE: LN= SLE pregnant women with lupus nephritis; non-LN= SLE pregnant women without lupus nephritis; GDM= gestational diabetes PROM= premature rupture of membranes; NS=not significant;

\*P value was <0.05 was considered significant
